# Supplementary material for: Snowflake relocated Cu2O electrocatalyst on an Ag backbone template for the production of liquid C2+ chemicals from CO2
Source: Royal Society of Chemistry journal article supplement (doi:10.1039/d4dt00199k), 2024-01-01
Supplement: d4dt00199k1.pdf [file d4dt00199k1.pdf]

## Supporting Information for

### **Snowflake relocated Cu<sub>2</sub>O electrocatalyst on Ag backbone template for the production of liquid C<sub>2+</sub> chemicals from CO<sub>2</sub>**

Youjin Lee<sup>a,b,c,†</sup>, Minjun Choi<sup>a,b,c,†</sup>, Sooan Bae<sup>a,b,c</sup>, Akhil Tayal<sup>d</sup>, Okkyun Seo<sup>e</sup>, Hojoon Lim<sup>d</sup>, Kug-Seung Lee<sup>f</sup>, Jae Hyuck Jang<sup>g</sup>, Beomgyun Jeong<sup>h,\*</sup>, and Jaeyoung Lee<sup>a,b,c,\*</sup>

<sup>a</sup> School of Earth Sciences and Environmental Engineering, Gwangju Institute of Science and Technology (GIST), 123 Cheomdangwagi-Ro, Buk-gu, Gwangju 61005, Republic of Korea

<sup>b</sup> International Future Research Center of Chemical Energy Storage and Conversion Processes (ifRC-CHESS), GIST, 123 Cheomdangwagi-Ro, Buk-gu, Gwangju 61005, Republic of Korea

<sup>c</sup> Ertl Center for Electrochemistry and Catalysis, GIST, 123 Cheomdangwagi-Ro, Buk-gu, Gwangju 61005, Republic of Korea

<sup>d</sup> National Synchrotron Light Source II, Brookhaven National Laboratory, Upton, New York 11973, USA

<sup>e</sup> Center for Synchrotron Radiation Research, Japan Synchrotron Radiation Research Institute (JASRI), 1-1-1 Kouto, Sayo, Hyogo 679-5198, Japan.

<sup>f</sup> Pohang Accelerator Laboratory, Pohang University of Science and Technology, Pohang 37673, Republic of Korea

<sup>g</sup> Center for Research Equipment, Korea Basic Science Institute (KBSI), 169-148 Gwahak-ro, Yuseong-gu, Daejeon 34133, Republic of Korea

<sup>h</sup> Research Center for Materials Analysis, KBSI, 169-148 Gwahak-ro, Yuseong-gu, Daejeon 34133, Republic of Korea

†These authors contributed equally to this work.

\*Corresponding author. E-mail address: [jaeyoung@gist.ac.kr](mailto:jaeyoung@gist.ac.kr) (J. Lee), [bjjeong@kbsi.re.kr](mailto:bjjeong@kbsi.re.kr) (B. Jeong)

Table S1. Faradaic efficiencies of the liquid C<sub>2+</sub> products of 2 hr CO<sub>2</sub>RR depend on applied potential

| Products                                               | FE (%) at applied potential (V <sub>RHE</sub> ) |      |      |       |      |
|--------------------------------------------------------|-------------------------------------------------|------|------|-------|------|
|                                                        | -1.1                                            | -1.2 | -1.3 | -1.35 | -1.4 |
| Acetaldehyde<br>(CH <sub>3</sub> CHO)                  | 5.06                                            | 7.17 | 6.76 | 7.29  | 2.88 |
| Ethanol<br>(C <sub>2</sub> H <sub>5</sub> OH)          | 2.51                                            | 2.77 | 5.91 | 4.07  | 0.55 |
| 1-propanol<br>(C <sub>3</sub> H <sub>7</sub> OH)       | 1.7                                             | 2.32 | 3.38 | 2.31  | 0.57 |
| Propionaldehyde<br>(C <sub>2</sub> H <sub>5</sub> CHO) | 1.19                                            | 0.61 | 1.71 | 0.62  | 0.31 |
| Allylic alcohol<br>(C <sub>3</sub> H <sub>5</sub> OH)  | 1.21                                            | 1.82 | 3.18 | 1.83  | 0.42 |
| Butyraldehyde<br>(C <sub>4</sub> H <sub>7</sub> CHO)   | 0.13                                            | 0.16 | 0.31 | 0.13  | 0.03 |

Table S2. Comparison of the CO<sub>2</sub>RR production rate of Cu-based catalysts

| Electrocatalyst                    | Electrolytes             | Electrode area (cm <sup>2</sup> ) | Potentials (V vs. RHE) | Current Density (mA cm <sup>-2</sup> ) | FE <sub>C2+</sub> liquid products (%) | Production rate (μmol h <sup>-1</sup> ) | References |
|------------------------------------|--------------------------|-----------------------------------|------------------------|----------------------------------------|---------------------------------------|-----------------------------------------|------------|
| Cu <sub>2</sub> O-Ag               | 0.5 M KHCO <sub>3</sub>  | 9                                 | -1.3                   | 21.37                                  | 21.24                                 | 125.01                                  | This work  |
| Ag-Cu <sub>2</sub> O <sub>PB</sub> | 0.1 M KHCO <sub>3</sub>  | 4                                 | -1.2                   | -2                                     | 38.17                                 | 12.73                                   | 5          |
| Cu-SA/NPC                          | 0.1 M KHCO <sub>3</sub>  | 6                                 | -0.36                  | -0.5                                   | 39.6                                  | 6.21                                    | 23         |
| 1-CuCNT-ImR                        | 0.5 M KHCO <sub>3</sub>  | 5.7                               | -2                     | -5                                     | 72.8                                  | 0.29                                    | 24         |
| NDD <sub>L</sub> /Si RA            | 0.5 M NaHCO <sub>3</sub> | -                                 | -0.8                   | -6                                     | 77.6                                  | 24.43                                   | 25         |

Table S3. XPS survey scan results of as-prepared Cu<sub>2</sub>O-Ag and after the CO<sub>2</sub>RR for 2 hr at -1.3 V<sub>RHE</sub>.

| Sample                   | Atomic Concentration (%) |       |        |       |
|--------------------------|--------------------------|-------|--------|-------|
|                          | Ag 3d5                   | C 1s  | Cu 2p3 | O 1s  |
| As prepared              | 3.26                     | 52.95 | 13.24  | 30.55 |
| After CO <sub>2</sub> RR | 0.28                     | 50.31 | 13.05  | 36.36 |

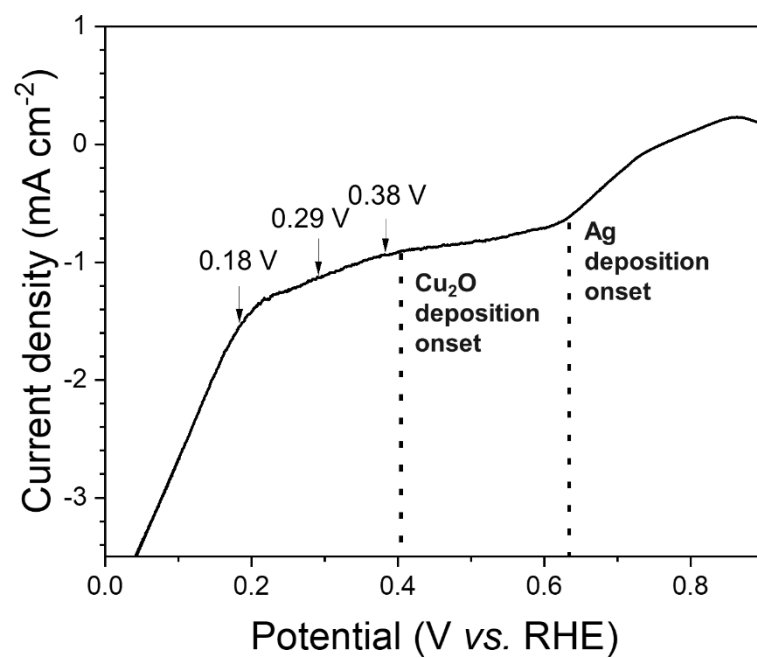

Fig. S1. LSV of the deposition solution, KCN solution containing CuSO<sub>4</sub> and AgNO<sub>3</sub> as a function of applied potential.

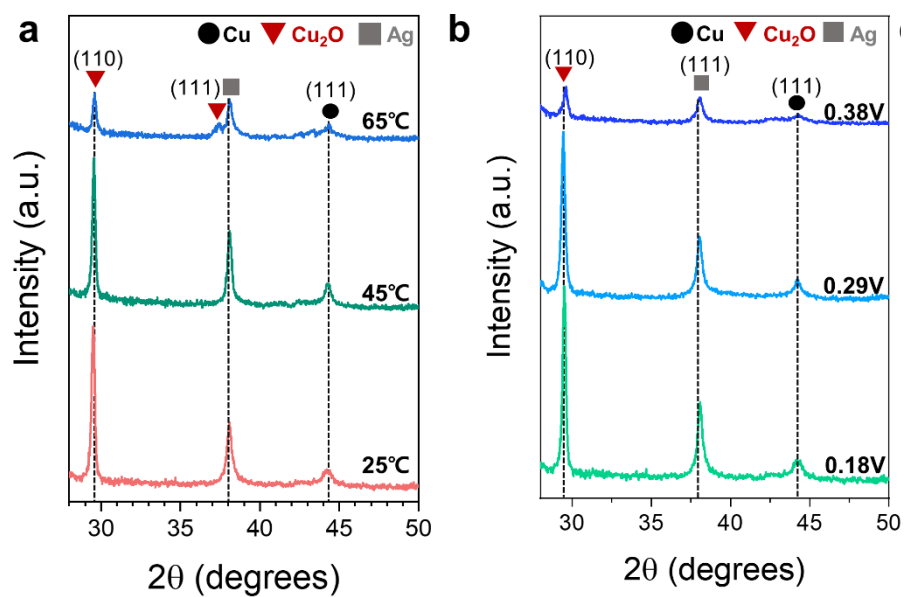

**Fig. S2.** Samples of the deposited Cu<sub>2</sub>O-Ag catalyst upon applying 0.18 V<sub>RHE</sub> under various conditions. (a) XRD patterns depending on temperature. (b) XRD patterns of the deposited catalysts depending on the applied voltage at room temperature (25°C).

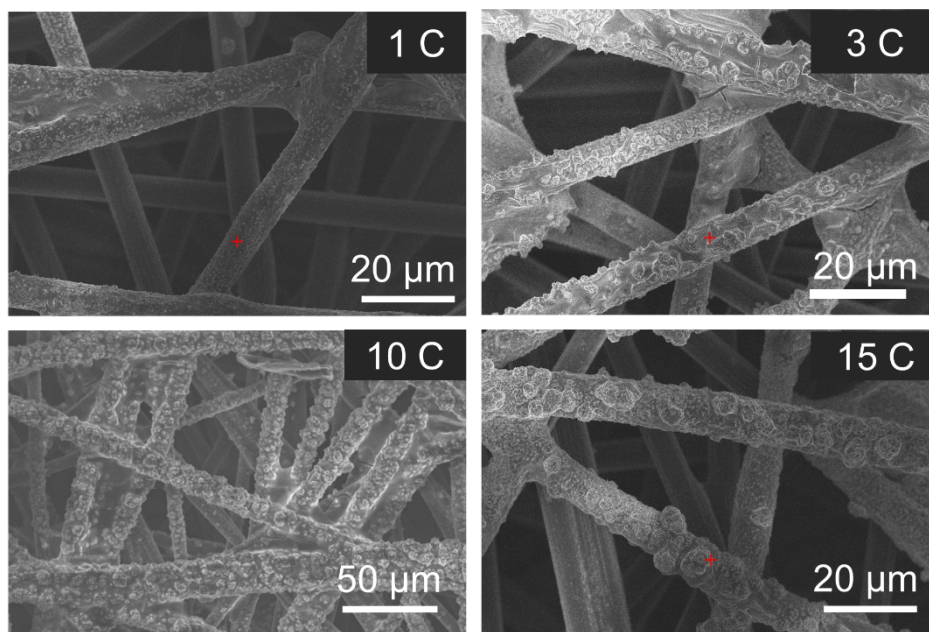

**Fig. S3.** SEM images of the Cu<sub>2</sub>O-Ag placed on a carbon paper deposited applying for various charge (1 C, 3 C, 10 C, and 15 C).

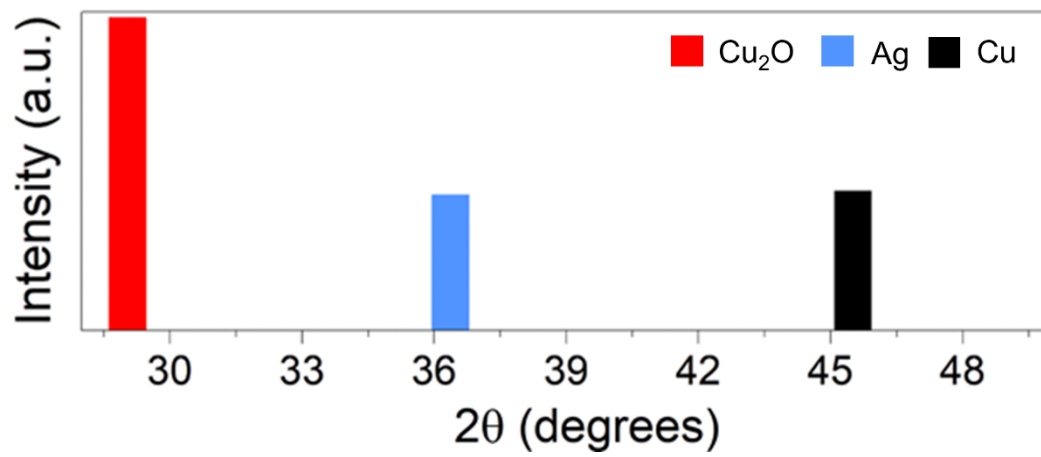

Fig. S4. SAED pattern converted to an XRD pattern of as-prepared Cu<sub>2</sub>O-Ag.



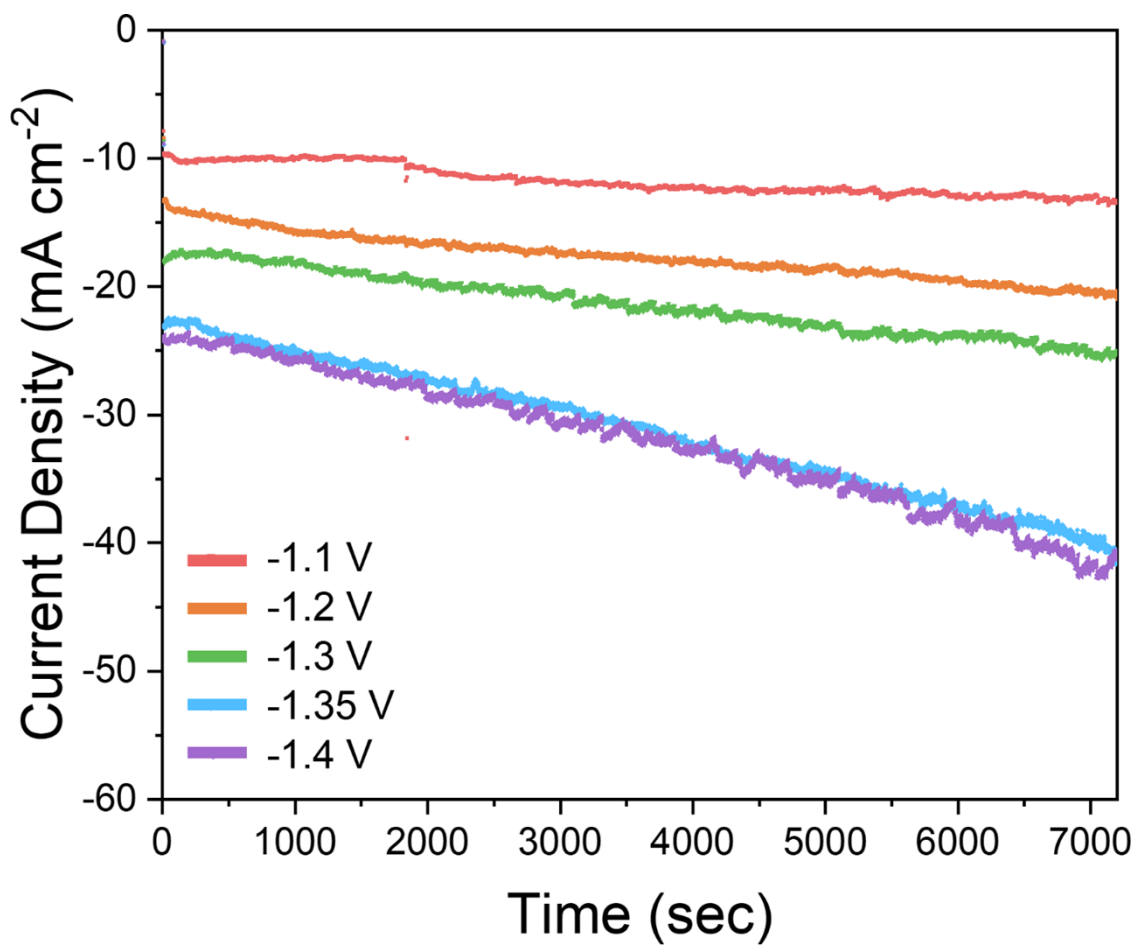

**Fig. S5.** Current density-time profile of the Cu<sub>2</sub>O-Ag electrode applying different cathode potentials for 2 hr. (Electrolyte: 0.5 M KHCO<sub>3</sub>, temperature: 25°C)

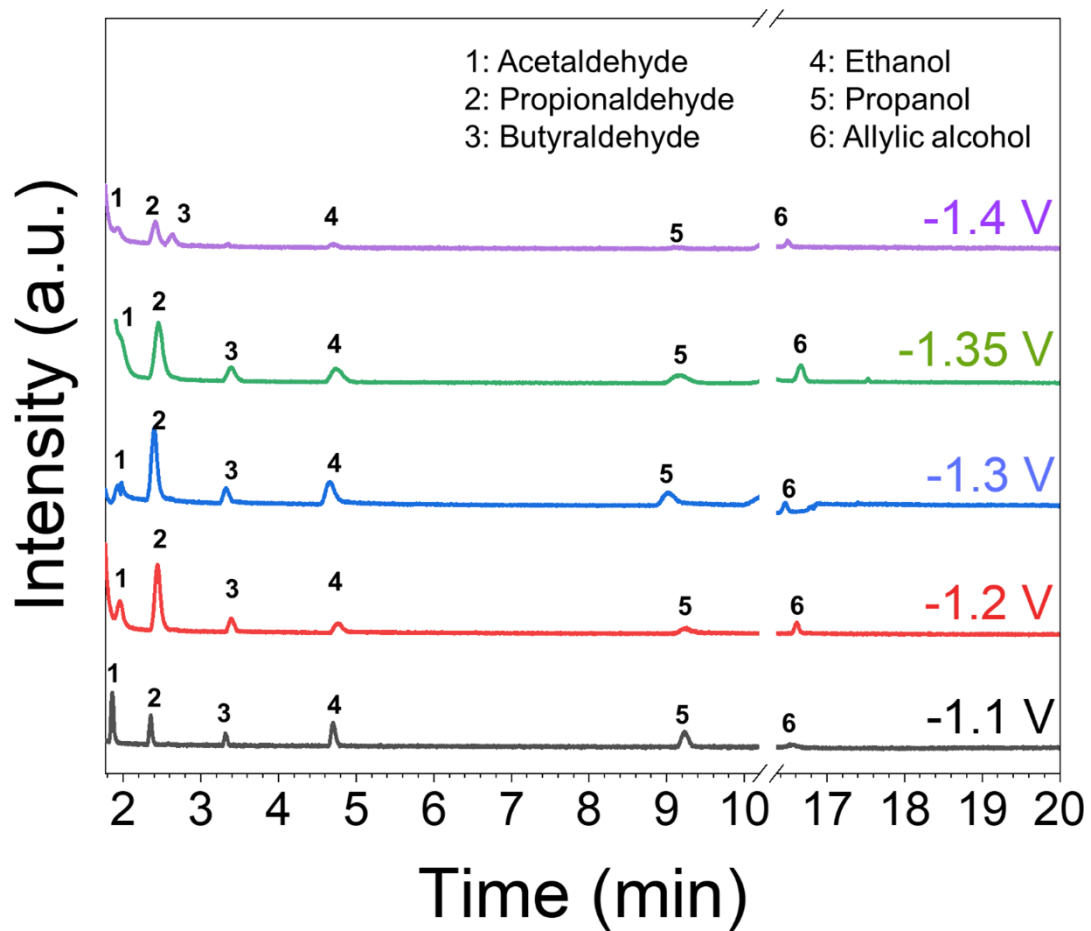

**Fig. S6.** HS-GC-MS total ion chromatogram of the catholyte samples after the CO<sub>2</sub>RR for 2 hr depending on the applied potentials. (Electrolyte: 0.5 M KHCO<sub>3</sub>, temperature: 25°C)

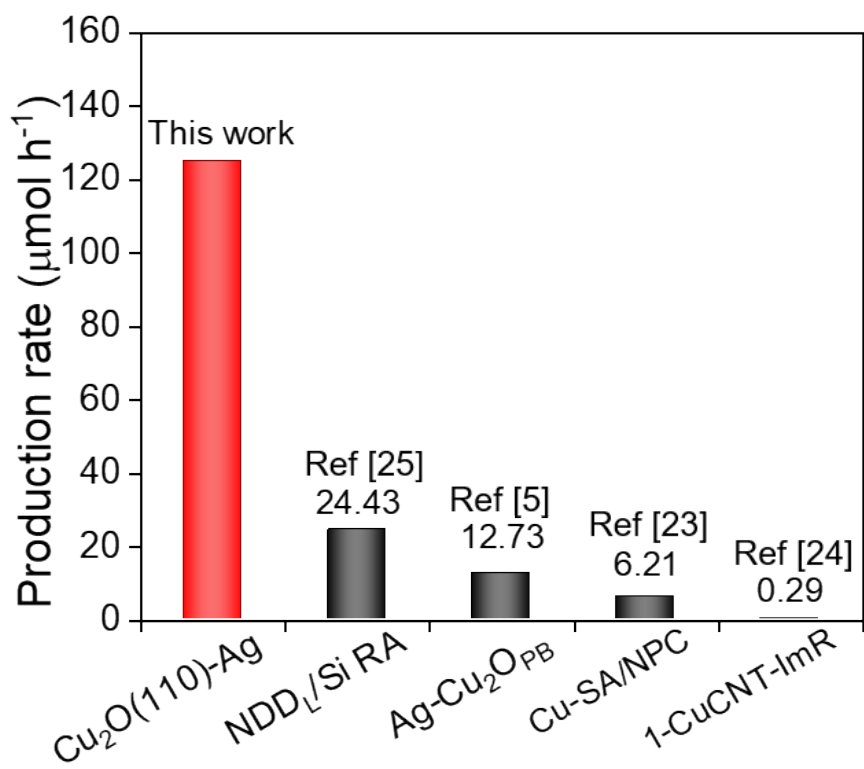

**Fig. S7.** Comparison of the liquid  $\text{C}_{2+}$  production rate of the relocated  $\text{Cu}_2\text{O-Ag}$  catalyst and other studies using Cu-based catalysts. (The experimental details are represented in Table S2 in the Supporting Information, Refs. 5, 23-25)

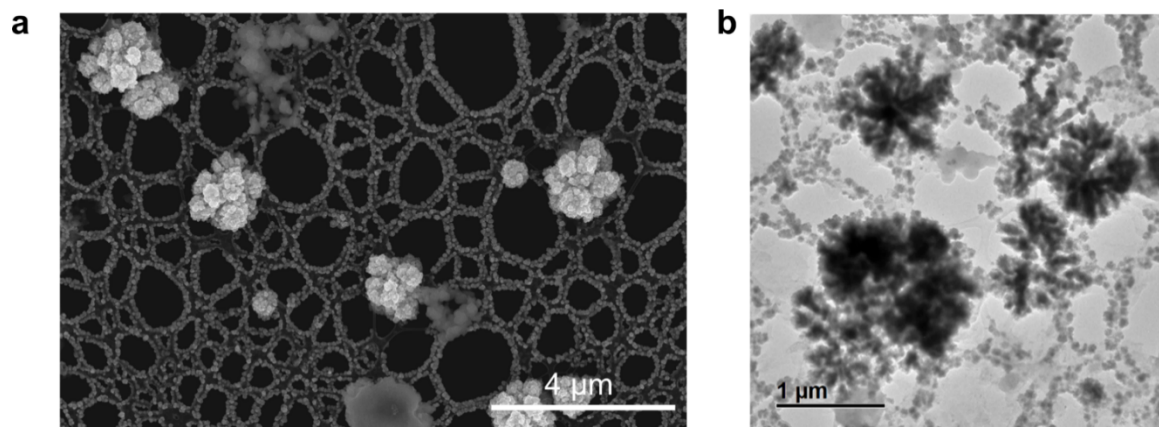

**Fig. S8.** (a) SEM and (b) TEM images of the relocated Cu(111)-Ag catalyst placed on a TEM grid after the CO<sub>2</sub>RR. Applied cathode potential: -1.3 V<sub>RHE</sub> for 2 hr.

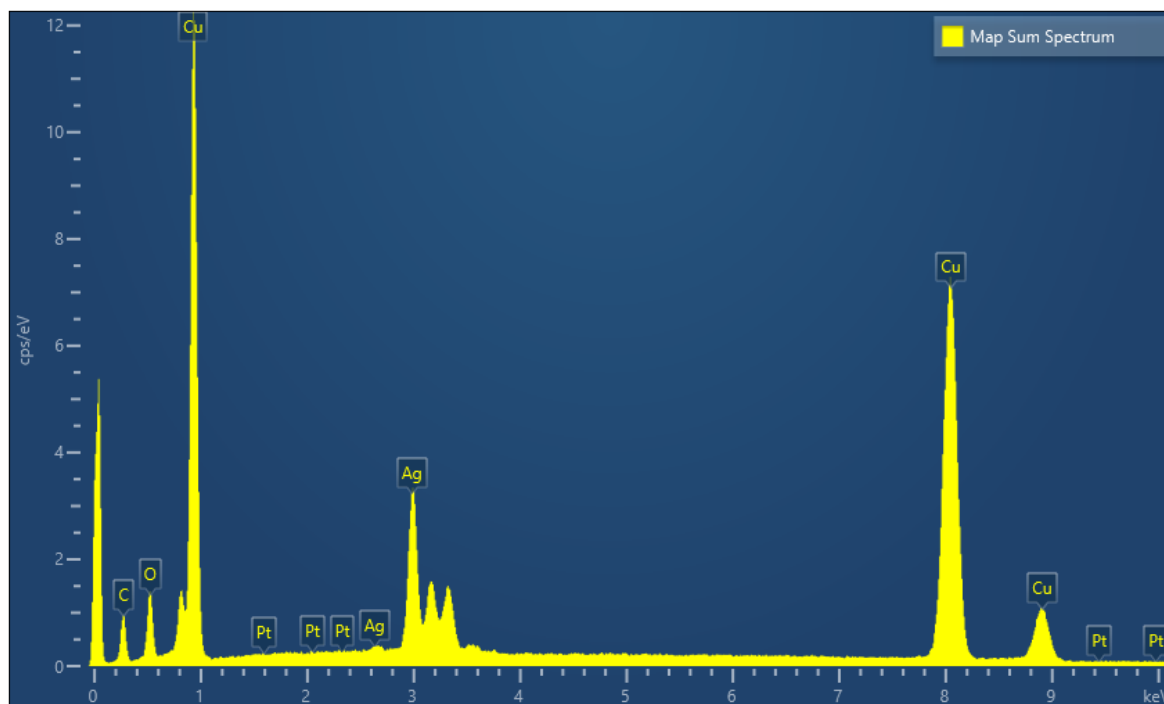

**Fig. S9.** SEM-EDS analysis of relocated Cu(111)-Ag after the CO<sub>2</sub>RR experiment for 2 hr at -1.3 V<sub>RHE</sub>.

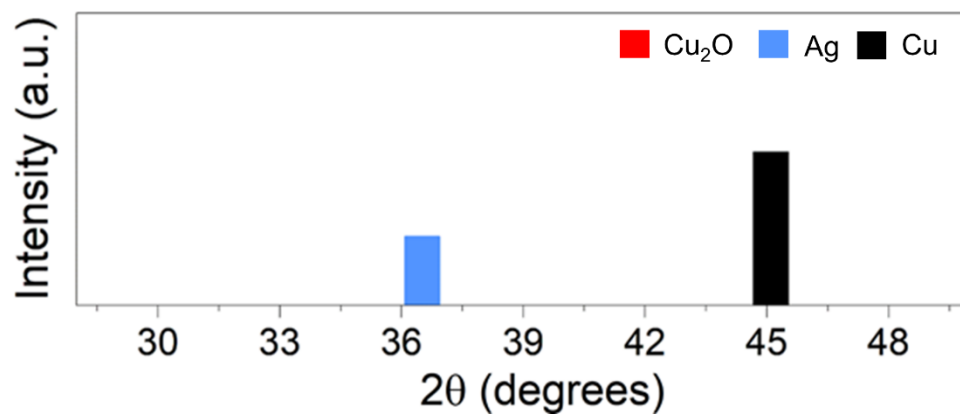

**Fig. S10.** SAED pattern converted to an XRD pattern of relocated Cu(111)-Ag after the CO<sub>2</sub>RR.

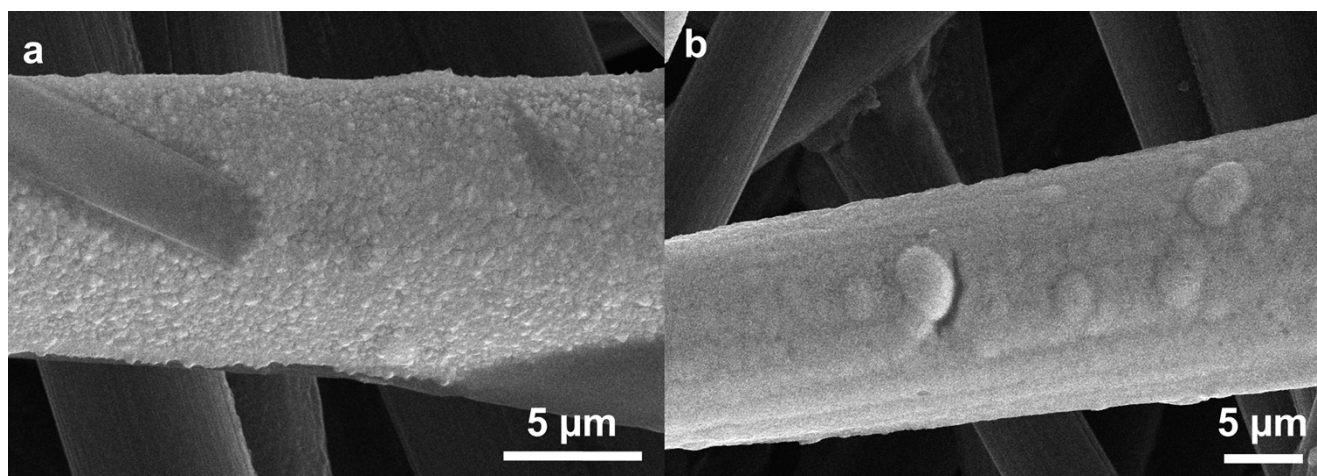

**Fig. S11.** SEM images of Cu electrode a) before and b) after 120 min of reaction under  $-1.3 V_{\text{RHE}}$  with  $\text{CO}_2$  gas purging.

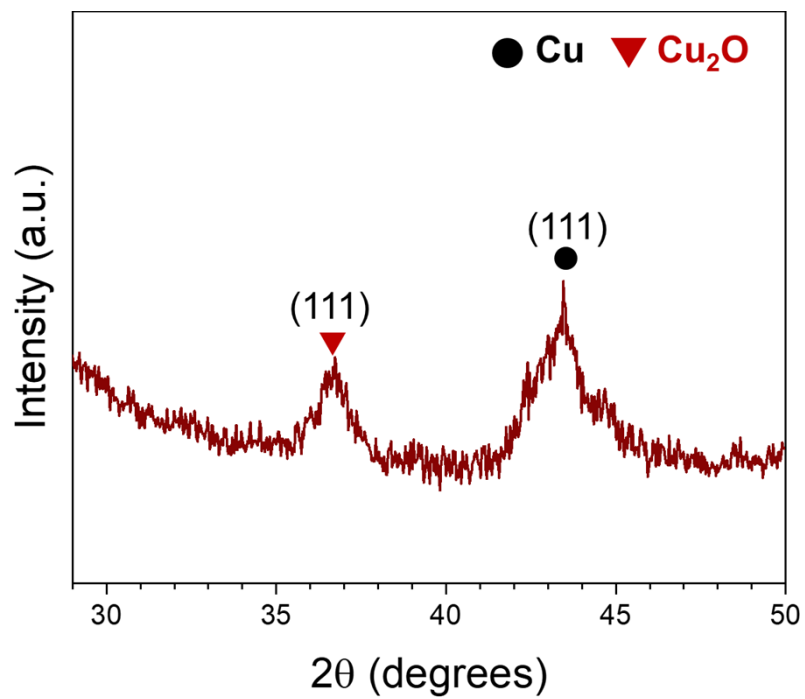

**Fig. S12.** XRD pattern of electrodeposited only Cu<sub>2</sub>O catalyst sample (at 0.182 V<sub>RHE</sub>, for 10 C, at 25°C)



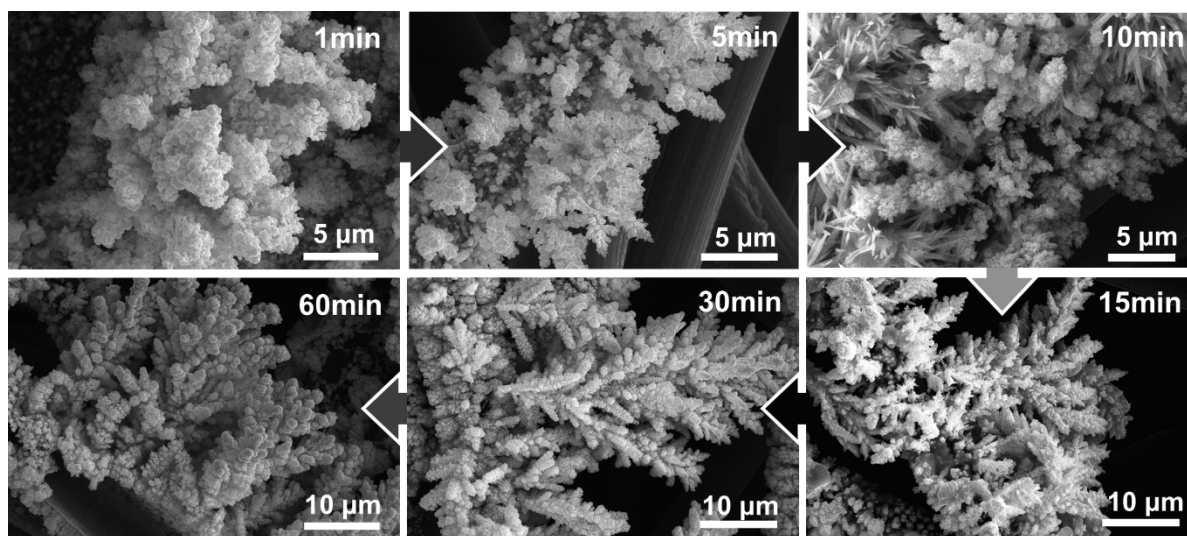

**Fig. S13.** (a) SEM images of relocated Cu(111)-Ag catalyst samples depending on the CO<sub>2</sub> reduction reaction time of 1 min, 5 min, 10 min, 15 min, 30 min, 60 min applying -1.3 V<sub>RHE</sub> with CO<sub>2</sub> gas purging.

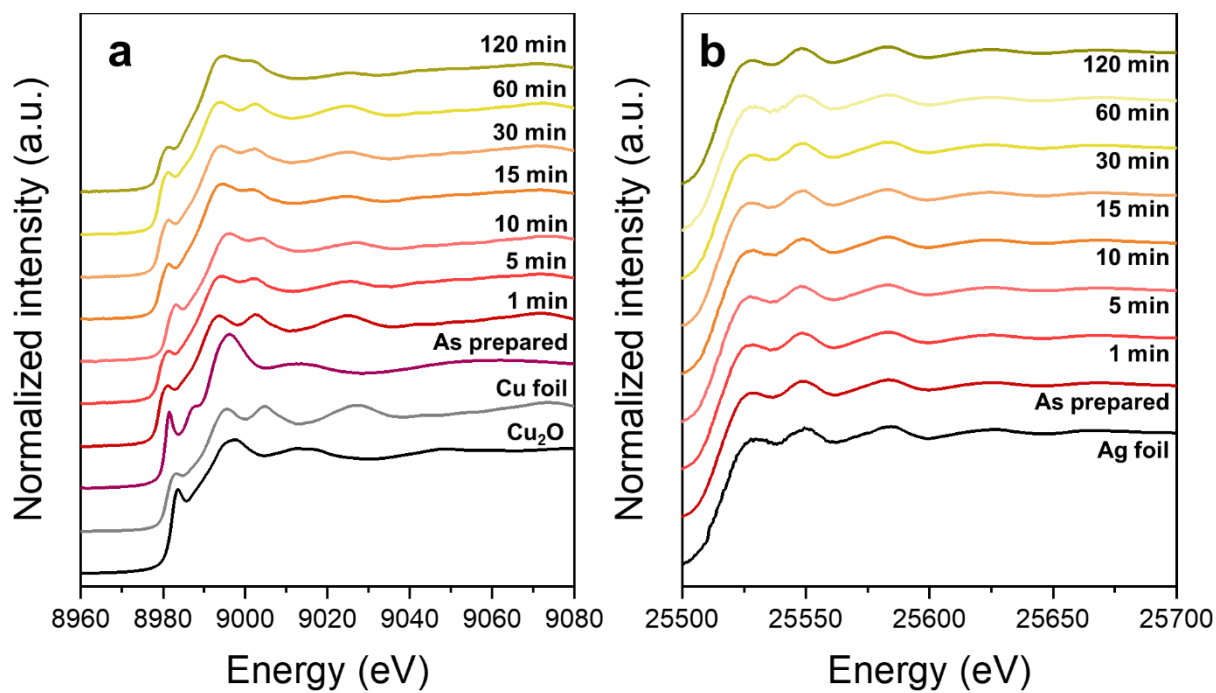

**Fig. S14.** Normalized **a** Cu and **b** Ag K-edge XANES spectra of Cu<sub>2</sub>O-Ag in as-prepared state and after 1, 5, 10, 15, 30, 60, and 120 min CO<sub>2</sub>RR at -1.3 V<sub>RHE</sub>.

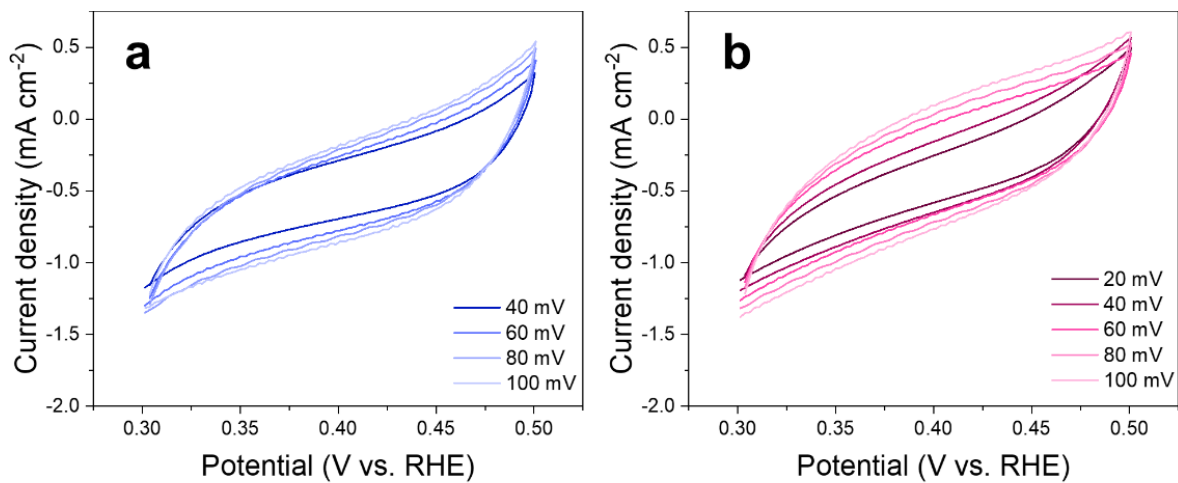

**Fig. S15.** Cyclic voltammetry taken over a range of scan rates to measure double-layer capacitances of Cu<sub>2</sub>O-Ag electrodes. (a) before and (b) after the CO<sub>2</sub>RR in 0.5 M KHCO<sub>3</sub>.
